# Supplementary material for: Hypoxia-induced lncRNA-NUTF2P3-001 contributes to tumorigenesis of pancreatic cancer by derepressing the miR-3923/KRAS pathway
Source: PubMed Central journal article supplement (PMC4868736; doi:10.18632/oncotarget.6830), 2016-01-07
Supplement: oncotarget-07-6000-s001.pdf [file oncotarget-07-6000-s001.pdf]

# Hypoxia-induced lncRNA-NUTF2P3-001 contributes to tumorigenesis of pancreatic cancer by derepressing the miR-3923/KRAS pathway

## Supplementary Materials

**A**

**Transcript: NUTF2P3-001** ENST00000448540

**Description** nuclear transport factor 2 pseudogene 3 [Source:HGNC Symbol;Acc:HGNC:50452]

**Location** [Chromosome 9: 77,580,245-77,580,628](#) forward strand.

**About this transcript** This transcript has [1 exon](#) and maps to [1 oligo probe](#).

**Gene** This transcript is a product of gene [ENSG00000228248](#) [Hide transcript table](#)

| Name        | Transcript ID   | bp  | Protein    | Translation ID | Biotype              | CCDS | Flags                 |
|-------------|-----------------|-----|------------|----------------|----------------------|------|-----------------------|
| NUTF2P3-001 | ENST00000448540 | 384 | No protein | -              | Processed pseudogene | -    | TSL:NA, GENCODE basic |

ATGGGAGATAAGCTGATTTGGAAGCAAACCTGAATCCAGCTTCATTTCAACATTACTACCAGTTATTTGATA  
 AAGATACAACCCGAATAGGTACAATTTACATTTGACGCGTCATGCCTTAGGTGGGAAGGACAGCAATGACA  
 GGGGAAAGCTGCCATTGTGGAGAAGTTGCTTAGCCTTCTGTTCCAGAAAATCCAGTACAGCATCACAGGC  
 ACAGGACAATTAGCCACACCAGATAGCTGCATCATCAGCATGGTTGTGGGTGAGCTTAAGGTAGATGAA  
 GACCCATCATCGGGTCCACCAGATGTTCTTAAAGAAATCAGTGAAGCTTGGGTTTGACCAATG  
 ACATGTTTCAGGCTTGCCCTGCTCACTTCGGCTGA

**B**

**Exons**

[Download sequence](#)

Exons/ Intron Non-coding exon Flanking sequence

| No. | Exon / Intron                   | Start      | End        | Start Phase | End Phase | Length | Sequence                                                                                                                                                                                                                                                                                                                                                                                                                        |
|-----|---------------------------------|------------|------------|-------------|-----------|--------|---------------------------------------------------------------------------------------------------------------------------------------------------------------------------------------------------------------------------------------------------------------------------------------------------------------------------------------------------------------------------------------------------------------------------------|
|     | 5' upstream sequence            |            |            |             |           |        | .....gccatagtgccagccccttgggtctctgcaaggccaggtgatgctccaga                                                                                                                                                                                                                                                                                                                                                                         |
| 1   | <a href="#">ENSE00001710738</a> | 77,580,245 | 77,580,628 | -           | -         | 384    | ATGGGAGATAAGCTGATTTGGAAGCAAACCTGAATCCAGCTTCATTTCAACATTACTACCAG<br>TTATTTGATAAAGTTACACCCGATAGGTACAATTTACATTTGACGCGTCATGCCTTAGGTGGGAAGGACAGCAATGACA<br>TGGGAAGGACAGCAATGACAGGGAAAGCTGCCATTTGGGAAGTTTCTTACCTCTG<br>TTCCAGAAATCCAGTACAGCATCACAGGCAAGAGCAATAGCCACACAGATAGCTG<br>CATCATCAGCATGGTTGTGGGTGAGCTTAAGGTAGATGAAGACCCCATCATCGGGTTCCA<br>CCAGATGTTCTTAAAGAAATCAGTGAAGCTTGGGTTTGACCAATGACATGTTTCAG<br>GCTTGCCCTGCTCACTTCGGCTGA |
|     | 3' downstream sequence          |            |            |             |           |        | cctctctcagccaggaactcacactgtttctctctcacacctcttccca.....                                                                                                                                                                                                                                                                                                                                                                          |

**Supplementary Figure S1: The information of lncRNA-NUTF2P3-001. (A)** The description, location and sequence of NUTF2P3-001. **(B)** The exon of this transcript.

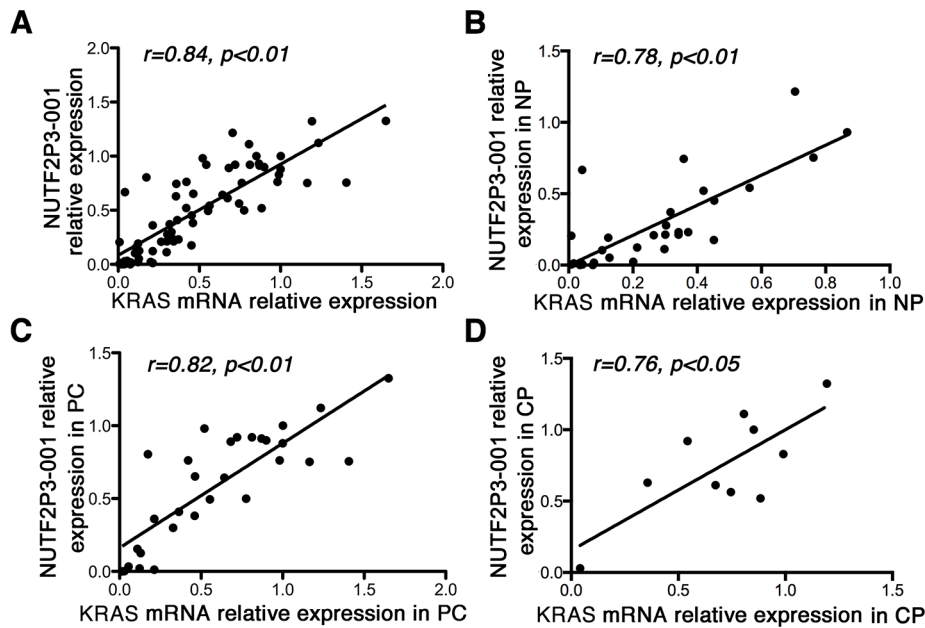

**Supplementary Figure S2: The correlation between expression of lncR-NUTF2P3-001 and KRAS mRNA in different pancreatic tissues.** (A) The correlations between NUTF2P3-001 and KRAS mRNA in pancreatic tissues. (B) The correlations between NUTF2P3-001 and KRAS mRNA level in noncancerous pancreatic tissue (NP). (C) The correlations between NUTF2P3-001 and KRAS mRNA level in pancreatic cancer (PC). (D) The correlations between NUTF2P3-001 and KRAS mRNA level in chronic pancreatitis (CP). The  $p$ -value represents the comparison between groups ( $*p < 0.05$ ,  $**p < 0.01$ ).

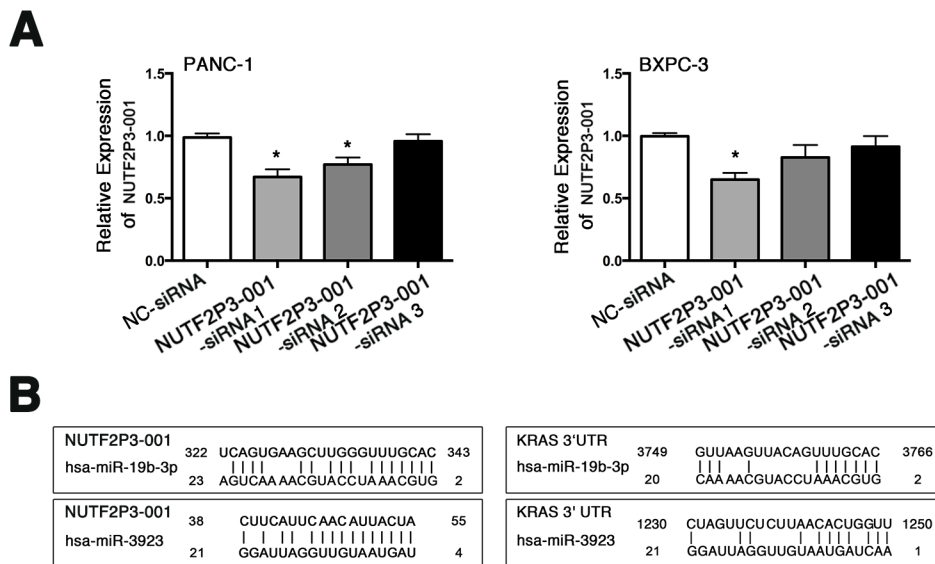

**Supplementary Figure S3: The siRNA sequences selection for lncRNA-NUTF2P3-001 and potential binding sites among lncRNA-NUTF2P3-001, miRNA-3923/miR-19b-3p and KRAS mRNA.** (A) Three NUTF2P3-001-siRNA (50nM) and corresponding negative control (NC-siRNA) were designed and the most effective one (NUTF2P3-001-siRNA 1) was chosen to fulfill the following experiment. (B) Potential binding sites among NUTF2P3-001, miRNA-3923/miR-19b-3p and KRAS mRNA. All data were presented as means  $\pm$  SD of at least three independent experiments. The  $p$ -value represents the comparison between groups ( $*p < 0.05$ ,  $**p < 0.01$ ).

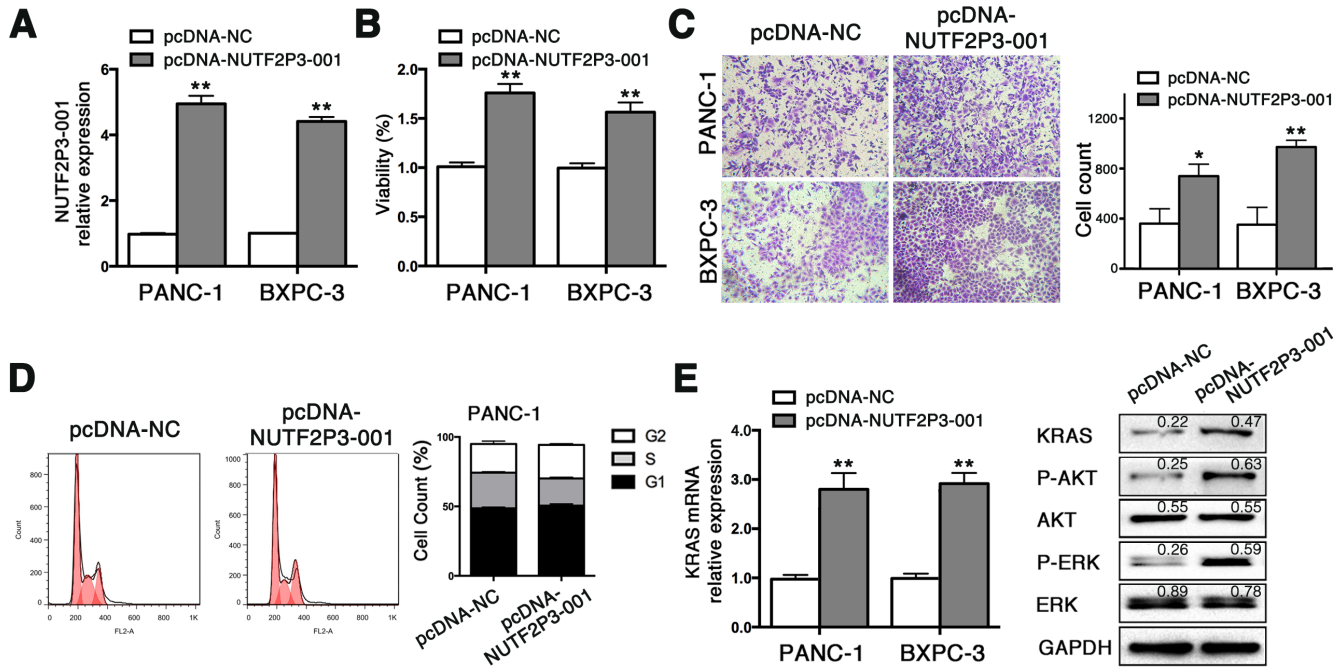

**Supplementary Figure S4: Overexpressed lncRNA-NUTF2P3-001 promoted viability, proliferation and invasive ability, while induced S phase arresting in pancreatic cancer cell.** (A) 48 h post transfection, total RNA was extracted and qRT-PCR was used to identify the efficiency of transfection with pcDNA3.1 containing NUTF2P3-001 sequence (pcDNA-NUTF2P3-001) in pancreatic cancer cell. (B) 72 h post transfection, MTT assays were performed and the results demonstrated that pcDNA-NUTF2P3-001 remarkably promoted viability in pancreatic cancer cell. (C) The capacity of invasion was identified by Transwell assay 48 h after transfection. (D) The cell cycle distribution was measured by flow cytometry in PANC-1 cells. The results showed that pcDNA-NUTF2P3-001 induced compromised accumulation of S-phase. (E) pcDNA-NUTF2P3-001 obviously upregulated KRAS mRNA expression both in PANC-1 and BXPC-3 cell lines. KRAS and its downstream proteins in PANC-1 treated with pcDNA-NUTF2P3-001 were tested by western blot in PANC-1 cells. KRAS, p-AKT/AKT and p-ERK/ERK were significantly activated. Relative intensity value is marked. All data were presented as means  $\pm$  SD of at least three independent experiments. The  $p$ -value represents the comparison between groups (\* $p < 0.05$ , \*\* $p < 0.01$ ).

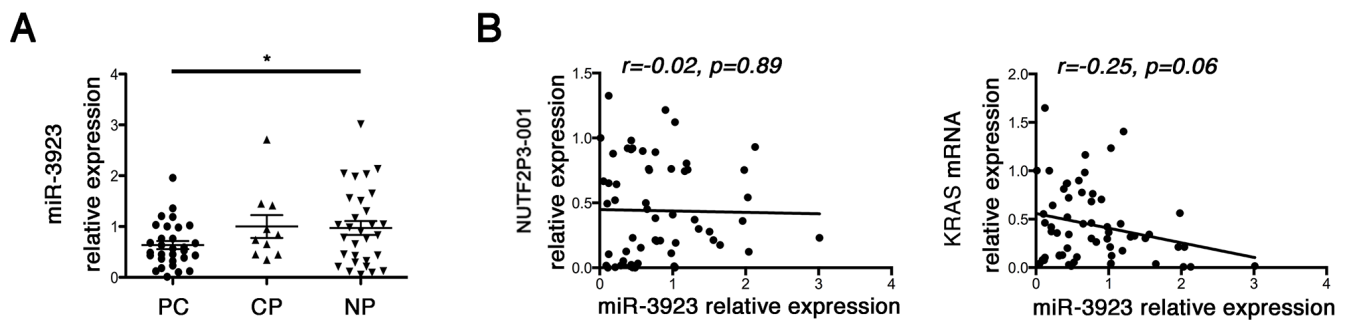

**Supplementary Figure S5: The expression of miR-3923 in pancreatic tissues and correlations with lncRNA-NUTF2P3-001 or KRAS mRNA.** (A) The expression of miR-3923 in 30 normal pancreas (NP), 10 chronic pancreatitis (CP) and 30 pancreatic cancer (PC) tissue samples was tested by qRT-PCR. Compared with normal pancreas (NP), miR-3923 was obviously decreased in pancreatic cancer (PC) specimens. (B) The correlations between miR-3923 and NUTF2P3-001 or KRAS expression in pancreatic tissues. The  $p$ -value represents the comparison between groups (\* $p < 0.05$ , \*\* $p < 0.01$ ).

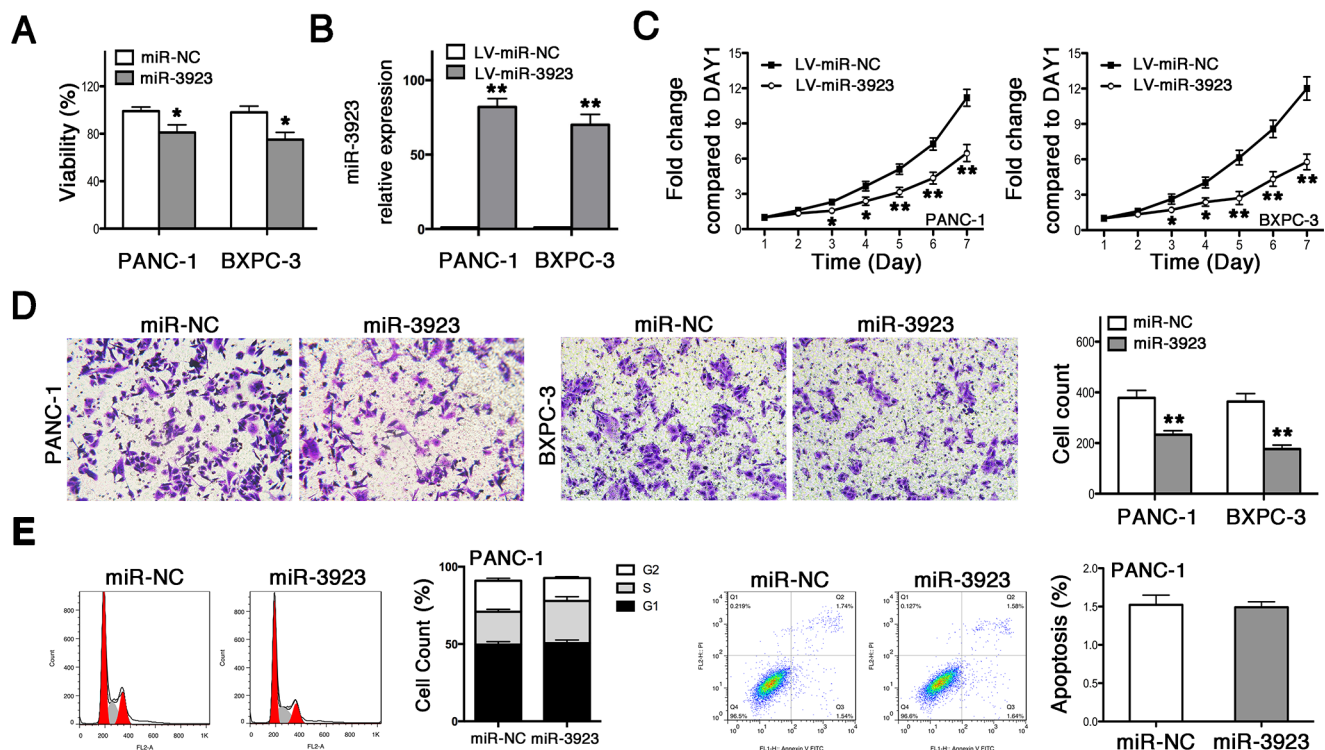

**Supplementary Figure S6: Overexpression of miR-3923 induced inhibition of proliferation and invasion, as well as S phase arresting in pancreatic cancer cell.** (A) The effect of overexpressed miR-3923 on viability of pancreatic cancer cell was examined by MTT assay. The restore of miR-3923 (50nM) could remarkably prohibit the viability of pancreatic cancer cell. (B) The efficiency of LV-miR-3923 transfection was measured by qRT-PCR in pancreatic cancer cell. (C) Pancreatic cancer cell was transfected with LV-miR-3923 and LV-miR-NC respectively by 7 days' observation. Cells in LV-miR-NC group proliferated much faster than that of LV-miR-3923 group. (D) After treated with miR-3923 mimics (50 nM) or miR-NC (50 nM), the invasive ability of Pancreatic cancer cell was measured by Matrigel invasion assays. The invasion capacity of pancreatic cancer cell was significantly weakened due to overexpressed miR-3923. (E) Pancreatic cancer cell was treated as above, and cell cycle distribution and apoptosis were measured by flow cytometry. Obvious S-phase block was detected in miR-3923 treated PANC-1 cells. All data were presented as means  $\pm$  SD of at least three independent experiments. The  $p$ -value represents the comparison between groups ( $*p < 0.05$ ,  $**p < 0.01$ ).

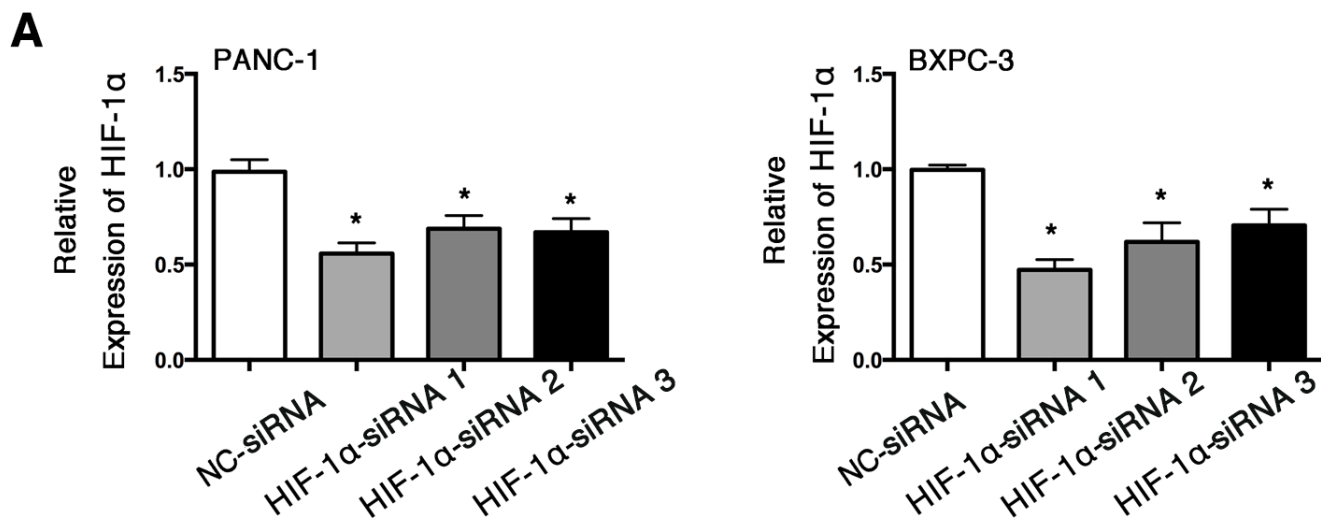

**Supplementary Figure S7: SiRNA sequences selection for HIF-1 $\alpha$ .** (A) Three HIF-1 $\alpha$ -siRNA and corresponding negative control (NC-siRNA) were designed and the most effective one (HIF-1 $\alpha$ -siRNA 1, 50 nM) for both PANC-1 and BXPC-3 was chosen to fulfill the following experiment. All data were presented as means  $\pm$  SD of at least three independent experiments. The  $p$ -value represents the comparison between groups ( $*p < 0.05$ ,  $**p < 0.01$ ).

**Supplementary Table S1: SiRNA Sequences, cloning sequence and primers for NUTF2P3-001 cloning**

| SiRNA Targets                    | Sequences                       |
|----------------------------------|---------------------------------|
| NUTF2P3-001-siRNA1 sense         | 5'-GAGAUAAAGCUGAUUUGGAA dTdT-3' |
| NUTF2P3-001-siRNA1 antisense     | 5'-dTdT CUCUAUUCGACUAAACCUU-3'  |
| NUTF2P3-001-siRNA2 sense         | 5'-CGAAUAGGUACAAUUUACA dTdT -3' |
| NUTF2P3-001-siRNA2 antisense     | 5'-dTdT GCUUAUCCAUGUUAAAUGU-3'  |
| NUTF2P3-001-siRNA3 sense         | 5'-CACAGGCACAGGACAAUUA dTdT-3'  |
| NUTF2P3-001-siRNA3 antisense     | 5'-dTdT GUGUCCGUGUCCUGUAAU-3'   |
| HIF-1 $\alpha$ -siRNA1 sense     | 5'-CUGAUGACCAGCAACUUGA dTdT -3' |
| HIF-1 $\alpha$ -siRNA1 antisense | 5'- dTdT GACUACUGGUCGUUGAACU-3' |
| HIF-1 $\alpha$ -siRNA2 sense     | 5'- CUGAUGACCAGCAACUUGA dTdT-3' |
| HIF-1 $\alpha$ -siRNA2 antisense | 5'- dTdT GACUACUGGUCGUUGAACU-3' |
| HIF-1 $\alpha$ -siRNA3 sense     | 5'- CAAUCAAGAAGUUGCAUUA dTdT-3' |
| HIF-1 $\alpha$ -siRNA3 antisense | 5'- dTdT GUUAGUUCUUCAACGUAAU-3' |

**LncRNA-NUTF2P3-001 clone sequence in pcDNA3.1 XhoI / BamHI**

5'-ATGGGAGATAAGCTGATTTGGAAGCAAAGTGAATCCAGCTTCATTCAACATTACTACCAGTTATTTGATA-AAGATACAACCCGAATAGGTACAATTTACATTGACGCGTCATGCCTTAGGTGGGAAGGACAGCAATGA-CAGGGGAAAGCTGCCATTGTGGAGAAGTTGTCTAGCCTTCTGTTCCAGAAAATCCAGTACAGCATCACAG-GCACAGGACAATTAGCCACACCCAGATAGCTGCATCATCAGCATGGTTGTGGGTGAGCTTAAGGTAGAT-GAAGACCCCATCATCGGGTTCCACCAGATGTTCCCTATTAAGAATATCAGTGAAGCTTGGGTTTGCACCAAT-GACATGTTCCAGGCTTGCCTGCTCACTTCGGCTGA-3'

**Primers for cloning:**

Sense: 5'- ACCGCTCGAGATGGGAGATAAGCTGATTTGGAAG -3'

Antisense: 5'- CCATGGATCCTCAGCCGAAGTGAGCAGGGCAAG -3'
